# Supplementary material for: TIC236 gain-of-function mutations unveil the link between plastid division and plastid protein import
Source: PubMed Central journal article supplement — Proc Natl Acad Sci U S A. 2022 Mar 11;119(11):e2123353119. doi: 10.1073/pnas.2123353119 (PMC8931380; doi:10.1073/pnas.2123353119), 2022-03-11
Supplement: pnas.2123353119.sapp.pdf [file pnas.2123353119.sapp.pdf]

## Supplementary Information for

### *TIC236* gain-of-function mutations unveil the link between plastid division and plastid protein import

Jun Fang<sup>a,b,e,1</sup>, Bingqi Li<sup>a,b,f,1</sup>, Lih-Jen Chen<sup>c</sup>, Vivek Dogra<sup>a,g</sup>, Shengji Luo<sup>a,b</sup>, Wangpin Wu<sup>a,b</sup>, Pengcheng Wang<sup>a</sup>, Inhwan Hwang<sup>d</sup>, Hsou-min Li<sup>c,2</sup>, and Chanhong Kim<sup>a,2</sup>

<sup>a</sup> Shanghai Center for Plant Stress Biology and CAS Center for Excellence in Molecular Plant Sciences, Chinese Academy of Sciences, Shanghai 200032, China

<sup>b</sup> University of the Chinese Academy of Sciences, Beijing 100049, China

<sup>c</sup> Institute of Molecular Biology, Academia Sinica, Taipei 11529, Taiwan

<sup>d</sup> Department of Life Sciences, Pohang University of Science and Technology, Pohang, Korea

<sup>e</sup> Present address: Department of Plant Sciences, University of Oxford, Oxford OX1 3RB, United Kingdom

<sup>f</sup> Present address: Max Planck Institute for Molecular Plant Physiology, 14476 Potsdam-Golm, Germany

<sup>g</sup> Present address: Biotechnology Division, CSIR-Institute of Himalayan Bioresource Technology, Palampur 176061, India

<sup>1</sup>J.F. and B.L. contributed equally to this work

<sup>2</sup>To whom correspondence may be addressed. Email: [chanhongkim@cemps.ac.cn](mailto:chanhongkim@cemps.ac.cn) and [mbhmli@gate.sinica.edu.tw](mailto:mbhmli@gate.sinica.edu.tw)

#### **This PDF file includes:**

Figures S1 to S7  
Table S1  
Legends for Datasets S1 to S5

#### **Other supplementary materials for this manuscript include the following:**

Datasets S1 to S5



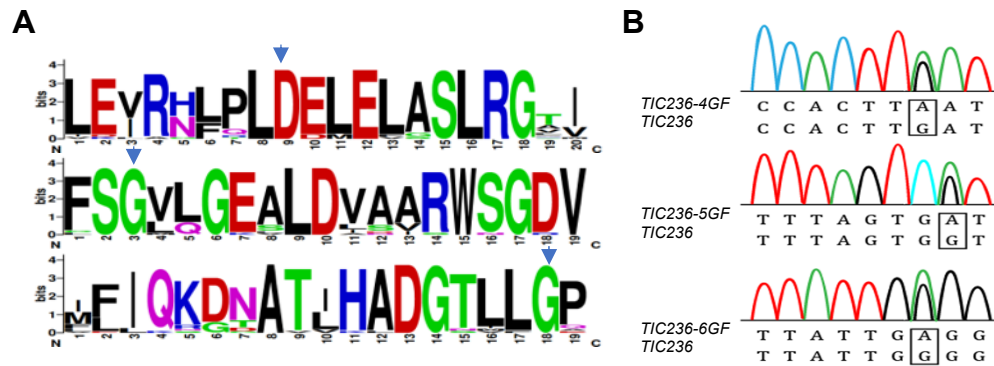

**Figure S2. TIC236-GF residues in different plant species and genotyping of *tic236-gf* mutants.** **A**, The TIC236-like protein sequences from 27 plant species reported in Phytozome v12.1 were aligned using ClustalW. The three mutated residues in *spr1* mutants are indicated with blue arrowheads. Aligned regions were visualized using WEBLOGO. **B**, Sanger DNA sequencing result of *TIC236* mutations in the plants shown in Fig. 1D.

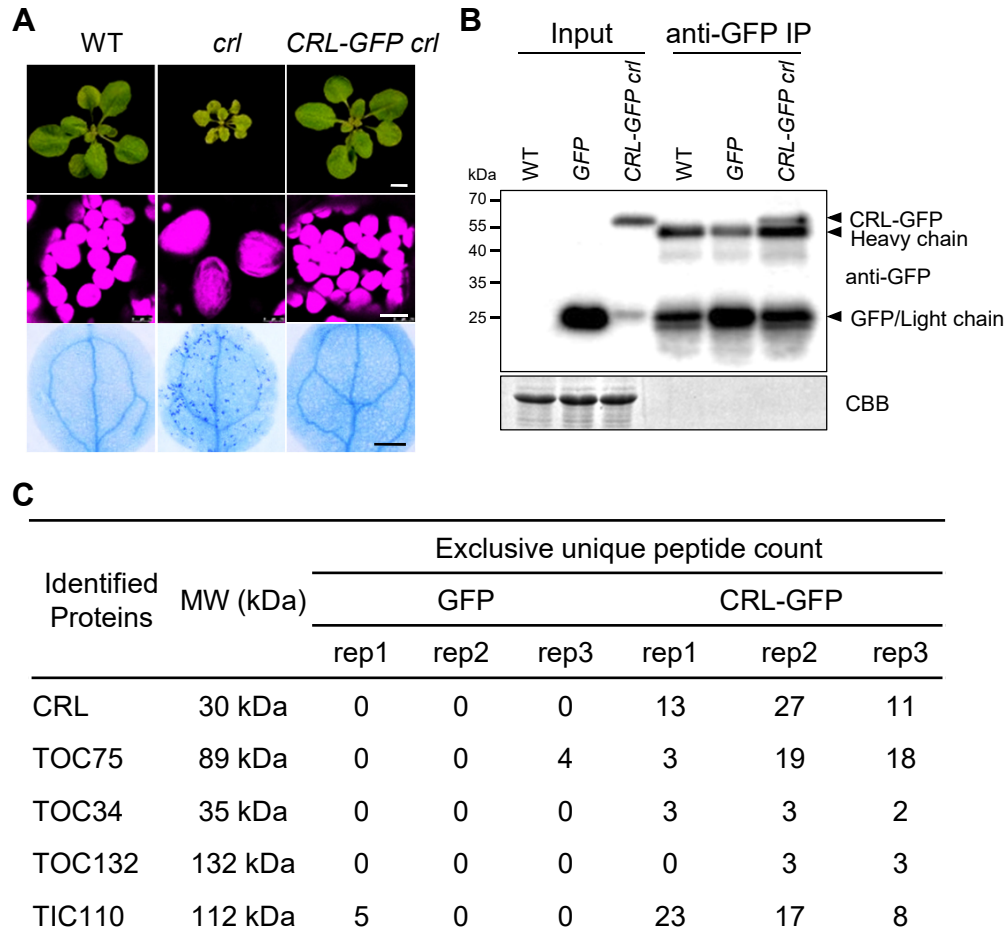

**Figure S3. The biologically active CRL-GFP fusion protein unveils CRL-associated proteins.** **A**, Top: images represent 21-day-old WT, *cr1*, and *35S::CRL-GFP cr1* (*CRL-GFP cr1*) plants. Scale bar, 5 mm. Middle: confocal images of chlorophyll autofluorescence of 5-day-old cotyledons (scale bar, 10  $\mu$ m). Bottom: localized cell death in 10-day-old cotyledons, as visualized by TB staining (scale bar, 0.5 mm). **B**, Western blot of Co-IP using 14-day-old WT, *35S::GFP* (*GFP*), and *CRL-GFP cr1* plants. GFP-conjugated Dynabeads were used to pull down CRL-GFP and its associated proteins. The proteins were subjected to MS analysis after digestion. In parallel, equal amounts of proteins were used for Western blot analysis. Heavy and light chains of the GFP antibody are indicated. Equal protein loading is shown by CBB staining. **C**, List of proteins showing TOC and TIC components, together with CRL, which were detected at least twice in the eluates from *CRL-GFP cr1* but not in *GFP* samples.

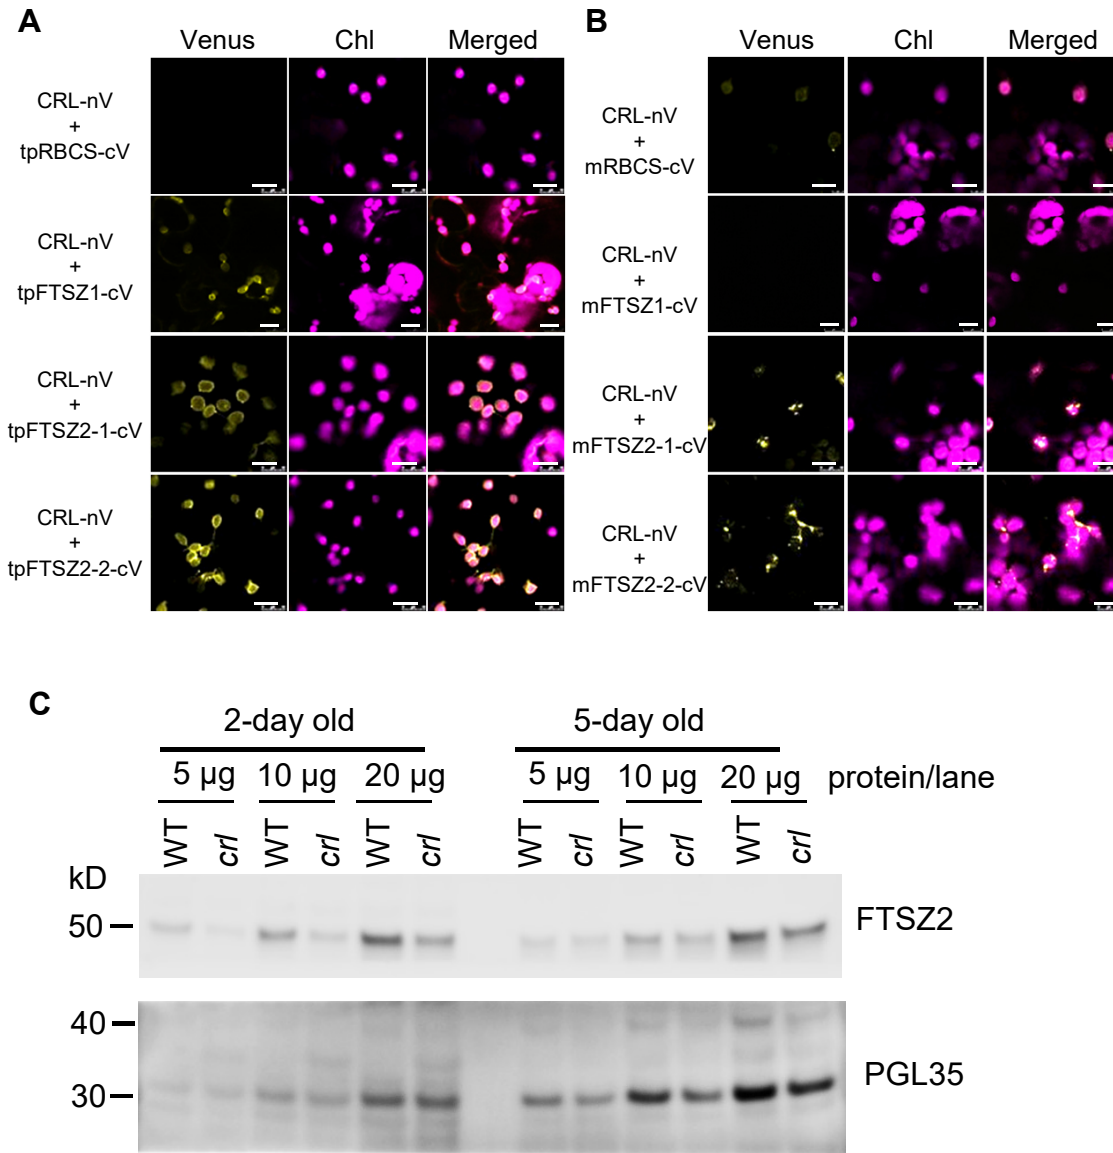

**Figure S4. CRL interacts with transit peptides of FTSZ proteins and the amounts of FTSZ2 family proteins were reduced in *crl* in 2-day-old seedlings.** **A** and **B**, Split-Venus constructs of CRL and the transit peptide (tp) lacking mature protein region (**A**) or tp-deleted mature protein (m) (**B**) of either RBCS, FTSZ1, FTSZ1, FTSZ2-1, or FTSZ2-2 were transiently coexpressed in *N. benthamiana* leaves. Fluorescence signal of the integrated Venus protein was monitored by confocal microscopy. Scale bar, 10  $\mu$ m. (**C**) Steady-state levels of FTSZ2 family proteins. Total proteins were extracted from wild-type (WT) and *crl* mutant seedlings grown on medium (1x MS and 2% sucrose and 16 h light/8 h dark) for 2 days or 5 days and were used for immunoblotting. Plastid PGL35 (PLASTOGLOBULIN 35, also called Fibrillin, At4g04020) was detected as a control.

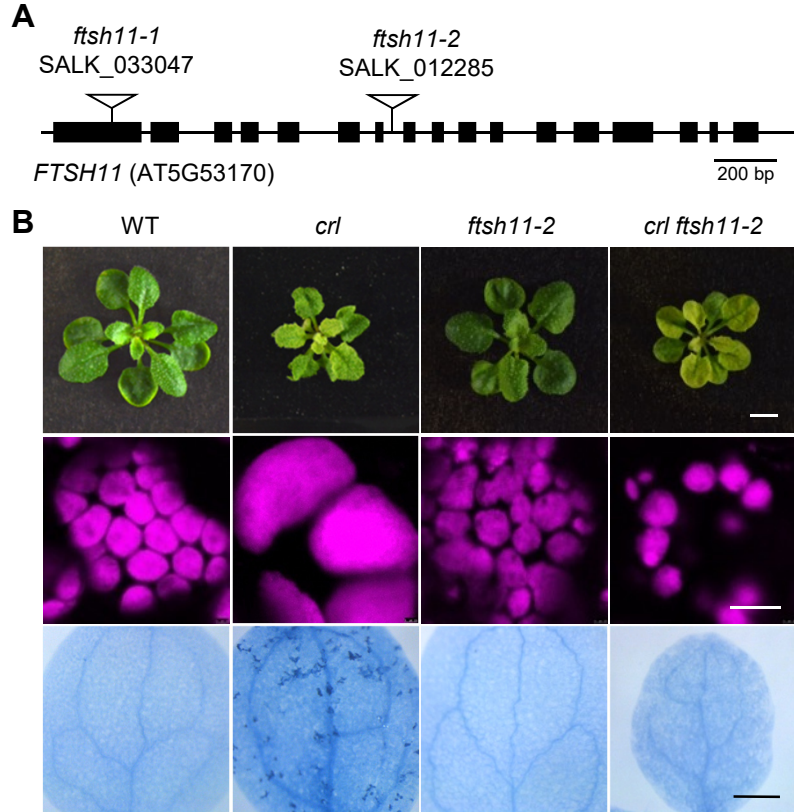

**Figure S5. The *ftsh11-2* allele of *ftsh11* mutants also significantly suppresses *cri* phenotypes.** **A**, Schematic representation of the FTSH11 gene (accession number: AT5G53170). Exons and introns are shown as black boxes and black lines between exons, respectively. The inverted triangles indicate the T-DNA insertion sites of the *ftsh11-1* (SALK\_033047) and *ftsh11-2* (SALK\_012285) mutants. **B**, Top: representative plant images of 21-day-old WT, *cri*, *ftsh11-2*, and *cri ftsh11-2* are shown (top panel). Middle: confocal images of chlorophyll signals from mesophyll cells (scale bar, 10  $\mu$ m). Bottom: cell death in cotyledons, as visualized via TB staining (Scale bar, 0.5 mm).

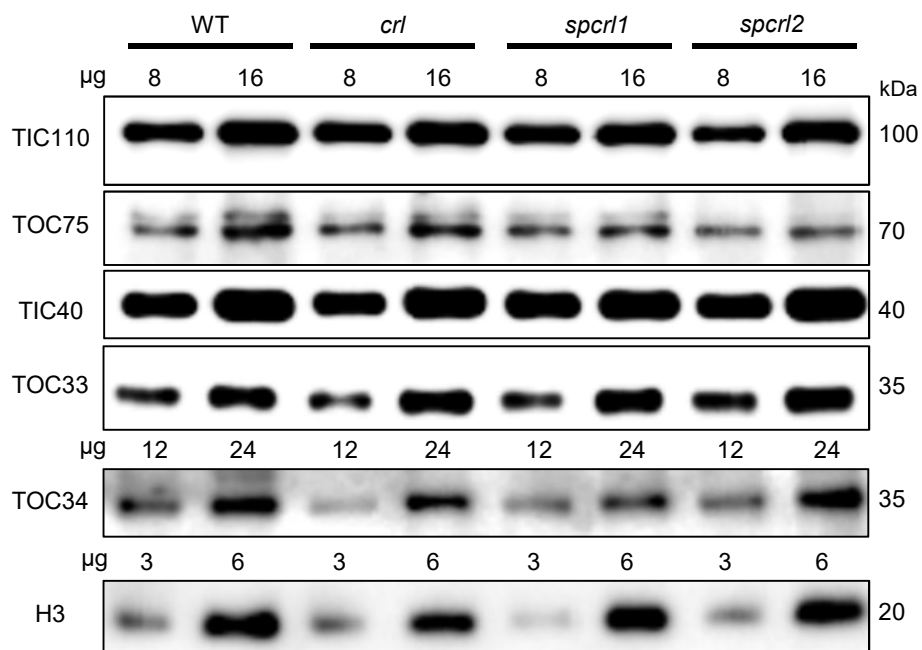

**Figure S6. The *crl* mutant phenotypes were not caused by reduced translocon protein levels.** Immunoblot analyses of total proteins extracted from 5-day-old seedlings. The amount of proteins loaded is indicated above the lane. The same amounts of proteins were loaded to examine the relative abundance of TIC110, TOC75, TIC40, and TOC33 proteins. H3 protein was used as a loading control.

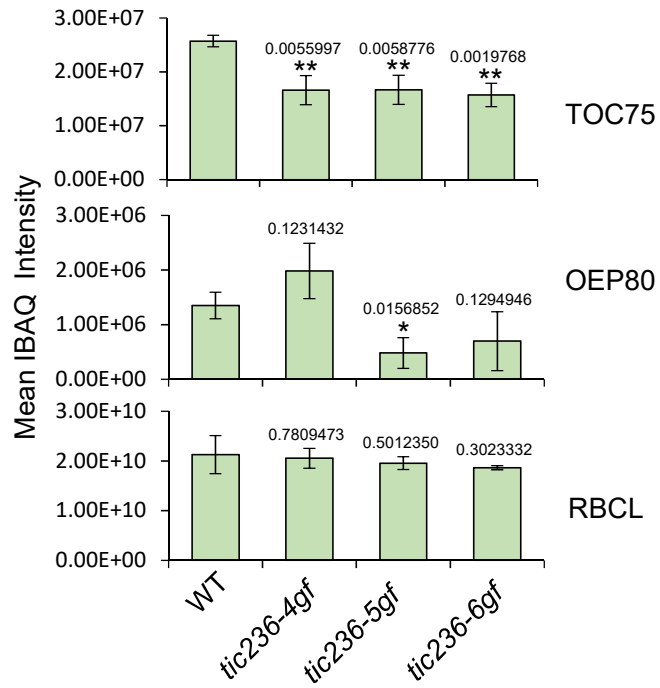

**Figure S7. Label-free protein quantitation of TOC75 and OEP80 proteins in *tic236-gf* plants.** iBAQ intensities are shown as mean  $\pm$  SD (n=3). Ribulose-bisphosphate carboxylase large-chain (RBCL) was chosen as the control. All *P*-values are from two-tailed Student's *t*-tests. \**P* < 0.05, \*\**P* < 0.01.



| ID        | Gene    | Name               | Primer sequence (5' to 3')                                     | Purpose                                       |
|-----------|---------|--------------------|----------------------------------------------------------------|-----------------------------------------------|
| AT5G51020 | CRL     | cr1-LP             | CCGAGAGACGTGAGATCAGT                                           | Genotyping                                    |
|           |         | cr1-RP             | ggtcacCTGTTCGAGATACA                                           |                                               |
| AT5G53170 | FTSH11  | ftsh11-1-LP        | CTCCTCTCCATACTTCTTCGT                                          |                                               |
|           |         | ftsh11-1-RP        | agtcacggaacaatacCAGT                                           |                                               |
| AT5G53170 | FTSH11  | ftsh11-2-LP        | AAGCAACCACTGCATGTTACC                                          |                                               |
|           |         | ftsh11-2-RP        | TGTCTTCCAGTACCAGGTGC                                           |                                               |
| AT1G63900 | SP1     | sp1-3-LP           | TATTCGCTGAATCGAGCAAAC                                          |                                               |
|           |         | sp1-3-RP           | GCTGCCATGTATAACAGGCTG                                          |                                               |
| AT2G25660 | TIC236  | tic236-2-LP        | GTTGTGTAATCCCACGCACATG                                         |                                               |
|           |         | tic236-2-RP        | ACGAAACGCCTTCTAGCTAC                                           |                                               |
| AT2G25660 | TIC236  | M4 seq F           | GTTGCTCTCCTTTTCTCTTC                                           | Sequencing to identify TIC236-4GF mutation    |
|           |         | M4 seq R           | CGAATTACAGACAACAGGCCA                                          |                                               |
| AT2G25660 | TIC236  | M5 seq F           | CTAAATCTTCAGAAGCGAAGAG                                         | Sequencing to identify TIC236-5GF mutation    |
|           |         | M5 seq R           | GGCAATACATATTCACCTTGAA                                         |                                               |
| AT2G25660 | TIC236  | M6 seq F           | TTGACTTCCATGGAGATGATTGG                                        | Sequencing to identify TIC236-6GF mutation    |
|           |         | M6 seq R           | TGGTGACAAGAGTTTCTCAAAGA                                        |                                               |
| AT3G18780 | ACT2    | Q ACTIN2 F         | CTGTTGACTACGAGCAGGAGATGG                                       | qRT-PCR                                       |
|           |         | Q ACTIN2 R         | CAAACGAGGGCTGGAACAAGACT                                        |                                               |
| AT2G37760 | AKR4C8  | Q AKR4C8 F         | CGGCTGTTAACCAAGTTGAATG                                         |                                               |
|           |         | Q AKR4C8 R         | CCCAAAGGAGAGTAACCAGATAAG                                       |                                               |
| AT1G77120 | ADH1    | Q ADH1 F           | GAGTGTGTGAACCCGAAAGA                                           |                                               |
|           |         | Q ADH1 R           | GTAGTCCCGAAGAAAGTACCC                                          |                                               |
| AT3G27630 | SMR7    | Q SMR7 F           | CGCCAAAACATCGATTCCGGG                                          |                                               |
|           |         | Q SMR7 R           | TCGAAATCTGAAGGAGGCACA                                          |                                               |
| AT1G70440 | SRO3    | Q SRO3 F           | CGGTTGGTACTCTGGTTCTAAA                                         |                                               |
|           |         | Q SRO3 R           | GCGAGAGAGTAACGATGATGAA                                         |                                               |
| AT5G51020 | CRL     | attb-CRL-F         | GGGGACAAGTTTGTACAAAAAAGCAGGCTtc<br>ATGGGTACCGAGTCGGGTTTC       | Generate CRL fragment for BiFC construct      |
|           |         | attb-CRL-R         | GGGGACCACTTTGTACAAGAAAGCTGGGTc<br>GTCTTGCAAGATGAGGGACCC        |                                               |
| AT1G02280 | TOC33   | attb-TOC33-F       | GGGGACAAGTTTGTACAAAAAAGCAGGCTtc<br>ATGGGTCTCTCGTTCTGTA         | Generate TOC33 fragment for BiFC construct    |
|           |         | attb-TOC33Ter-R    | GGGGACCACTTTGTACAAGAAAGCTGGGTc<br>TTAAAGTGGCTTTCCACTTGT        |                                               |
| AT5G05000 | TOC34   | attb-TOC34-F       | GGGGACAAGTTTGTACAAAAAAGCAGGCTT<br>CATGGCAGCTTTGCAAACGCTTCGT    | Generate TOC34 fragment for BiFC construct    |
|           |         | attb-TOC34Ter-R    | GGGGACCACTTTGTACAAGAAAGCTGGGTc<br>TCAAGACCTTCGACTTGCTAAACC     |                                               |
| AT1G67090 | RBCS1A  | attb-mRbcSatg-F    | GGGGACAAGTTTGTACAAAAAAGCAGGCTT<br>CATGGAATTGGCTAAGGAAGTTGACT   | Generate mRBCS fragment for BiFC construct    |
|           |         | attb-mRbcS-R       | GGGGACCACTTTGTACAAGAAAGCTGGGTc<br>ACCGGTGAAGCTTGGTGCC          |                                               |
| AT5G55280 | FTSZ1   | attb-mFtsZ1atg-F   | GGGGACAAGTTTGTACAAAAAAGCAGGCTT<br>CATGTCCTTCTCTCCGATGGAATCTGCG | Generate mFTSZ1 fragment for BiFC construct   |
|           |         | attb-mFtsZ1-R      | GGGGACCACTTTGTACAAGAAAGCTGGGTc<br>GAAGAAAAGTCTACGGGGAGAAGACGA  |                                               |
| AT2G36250 | FTSZ2-1 | attb-mFtsZ2-1atg-F | GGGGACAAGTTTGTACAAAAAAGCAGGCTT<br>CATGGCCGCTCAGAAATCTGAAATC    | Generate mFTSZ2-1 fragment for BiFC construct |
|           |         | attb-mFtsZ2-1-R    | GGGGACCACTTTGTACAAGAAAGCTGGGTc<br>GACTCGGGGATAACGAGAG          |                                               |
| AT3G52750 | FTSZ2-2 | attb-mFtsZ2-2atg-F | GGGGACAAGTTTGTACAAAAAAGCAGGCTT<br>CATGGCTTCTCATAAGTACGAGTCTTC  | Generate mFTSZ2-2 fragment for BiFC construct |
|           |         | attb-mFtsZ2-2-R    | GGGGACCACTTTGTACAAGAAAGCTGGGTc<br>GAGGCGAGGATAGCGAGAGC         |                                               |

|           |         |                  |                                                            |                                                   |
|-----------|---------|------------------|------------------------------------------------------------|---------------------------------------------------|
| AT5G55280 | FTSZ1   | attb-FtsZ1tp-F   | GGGGACAAGTTTGTACAAAAAAGCAGGCTT<br>CATGGCGATAATTCCGTTAGCA   | Generate tpFTSZ1 fragment<br>for BiFC construct   |
|           |         | attb-FtsZ1tp-R   | GGGGACCACTTTGTACAAGAAAGCTGGGTC<br>TGTTGAATCGCTTCTTCGTTT    |                                                   |
| AT2G36250 | FTSZ2-1 | attb-FtsZ2-1tp-F | GGGGACAAGTTTGTACAAAAAAGCAGGCTT<br>CATGGCAACTTACGTTTCACC    | Generate tpFTSZ2-1<br>fragment for BiFC construct |
|           |         | attb-FtsZ2-1tp-R | GGGGACCACTTTGTACAAGAAAGCTGGGTC<br>AACAACAACCTCGGTTTTTCTTAC |                                                   |
| AT3G52750 | FTSZ2-2 | attb-FtsZ2-2tp-F | GGGGACAAGTTTGTACAAAAAAGCAGGCTT<br>CATGGCAGCTTATGTTTCTCC    | Generate tpFTSZ2-2<br>fragment for BiFC construct |
|           |         | attb-FtsZ2-2tp-R | GGGGACCACTTTGTACAAGAAAGCTGGGTC<br>AACAACACGATATCTTTAGTAG   |                                                   |
| AT1G67090 | RBCS1A  | attb-RbcStp-F    | GGGGACAAGTTTGTACAAAAAAGCAGGCTT<br>CATGGCTTCCTCTATGCTCTCT   | Generate tpRBCS fragment<br>for BiFC construct    |
|           |         | attb-RbcStp-R    | GGGGACCACTTTGTACAAGAAAGCTGGGTC<br>GGAATCGGTAAGTCAGGAAG     |                                                   |

**Table S1: List of primers used in this study.**

**Dataset S1 (separate file).** The expression levels of genes upregulated in 5-day-old seedlings of *crl* versus WT are shown in *spcrl1*.

**Dataset S2 (separate file).** The expression levels of genes downregulated in 5-day-old seedlings of *crl* versus WT are shown in *spcrl1*.

**Dataset S3 (separate file).** List of the proteins that were found to be associated with CRL.

**Dataset S4 (separate file).** List of TOC, TIC, and plastid division proteins that may associate with CRL.

**Dataset S5 (separate file).** iBAQ intensity of TOC and TIC proteins in *tic236gf* mutants versus WT.
